# Supplementary material
Source: ML conference proceedings conference paper supplement (https://openaccess.thecvf.com/content/ICCV2023/html/Zhong_Improving_Equivariance_in_ICCV_2023_paper.html)
Supplement: Supplementary file 1 [file Zhong_Improving_Equivariance_in_ICCV_2023_supplemental.zip]

Archive with 3 entries (3 files):
- movie_midas3(dpt)_after_finetuning(ours).mp4
- movie_midas3(dpt)_original_not_equivariant.mp4
- supp.pdf
